# Supplementary material for: Long Non-Coding RNAs Associated with Heterochromatin Function in Immune Cells in Psychosis
Source: Noncoding RNA. 2018 Dec 18;4(4):43. doi: 10.3390/ncrna4040043 (PMC6316406; doi:10.3390/ncrna4040043)
Supplement: Supplementary file 1 [file ncrna-04-00043-s001.pdf]

Supplementary Materials

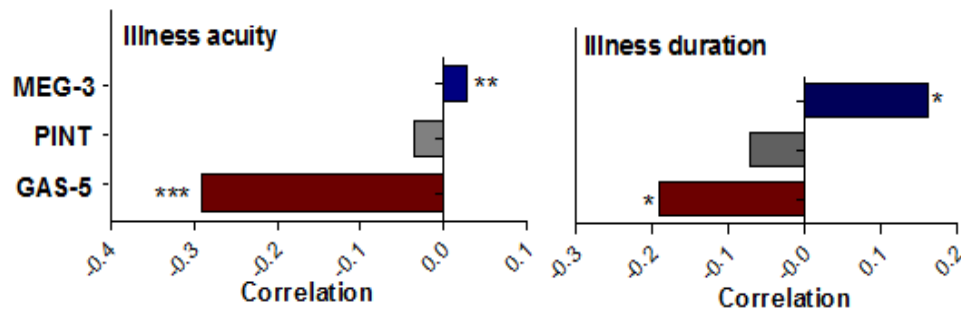

**Figure S1.** Correlation between symptom severity and lncRNA expression;  $r$ =Spearman correlations; \* $p$ <0.05; \*\* $p$ <0.02; \*\*\* $p$ <0.001. †Chronic conditions and first episode ‡Inpatients and outpatients.

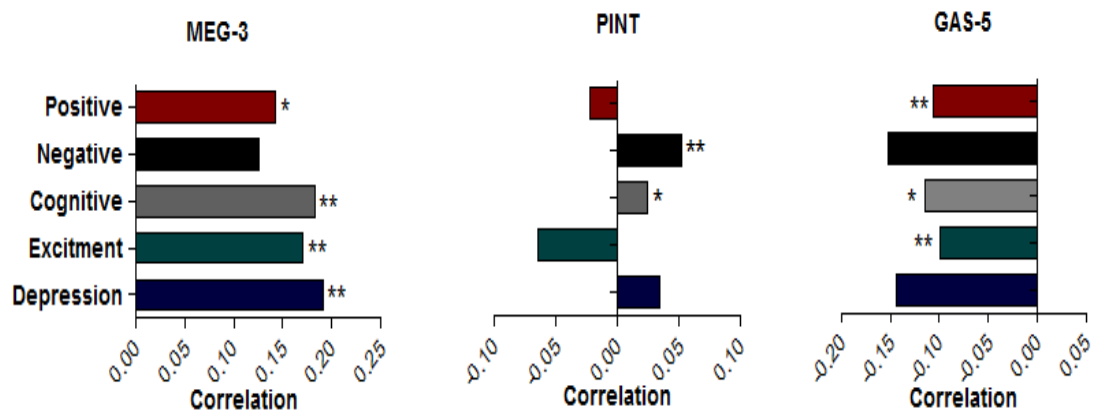

**Figure S2.** Correlational strength between lncRNA expression and disease severity (PANSS five factor sub-scale) Spearman correlations \* $p$ <0.05; \*\* $p$ <0.02.

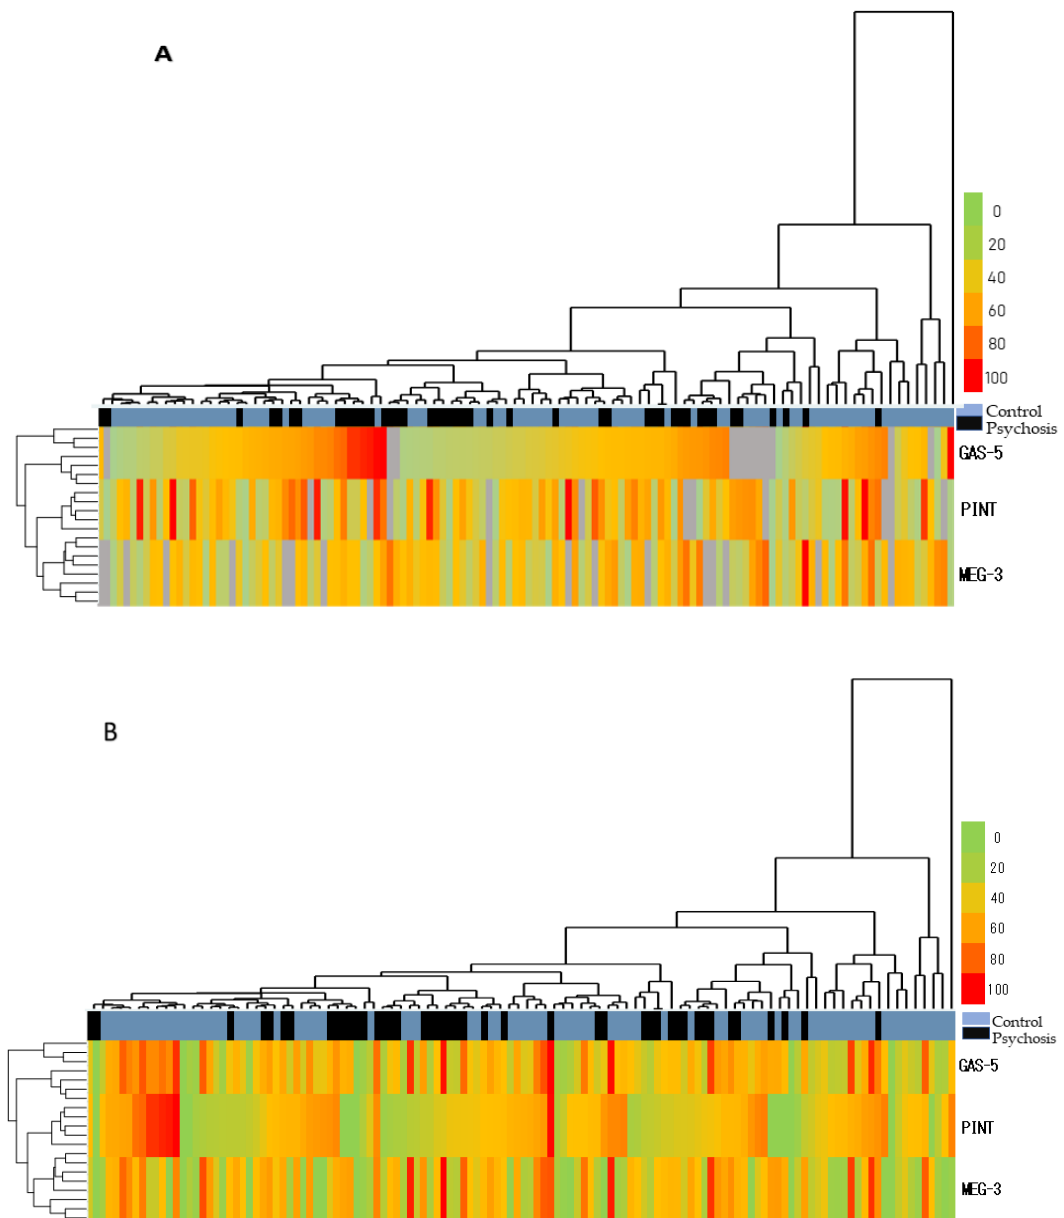

**Figure S3:** Dendrograms and heat map of hierarchical clustering analysis (complete-linkage) by the expression of lncRNAs MEG-3, PINT and GAS-5, (A) predicting clinical diagnosis and, (B) predicting symptom acuity

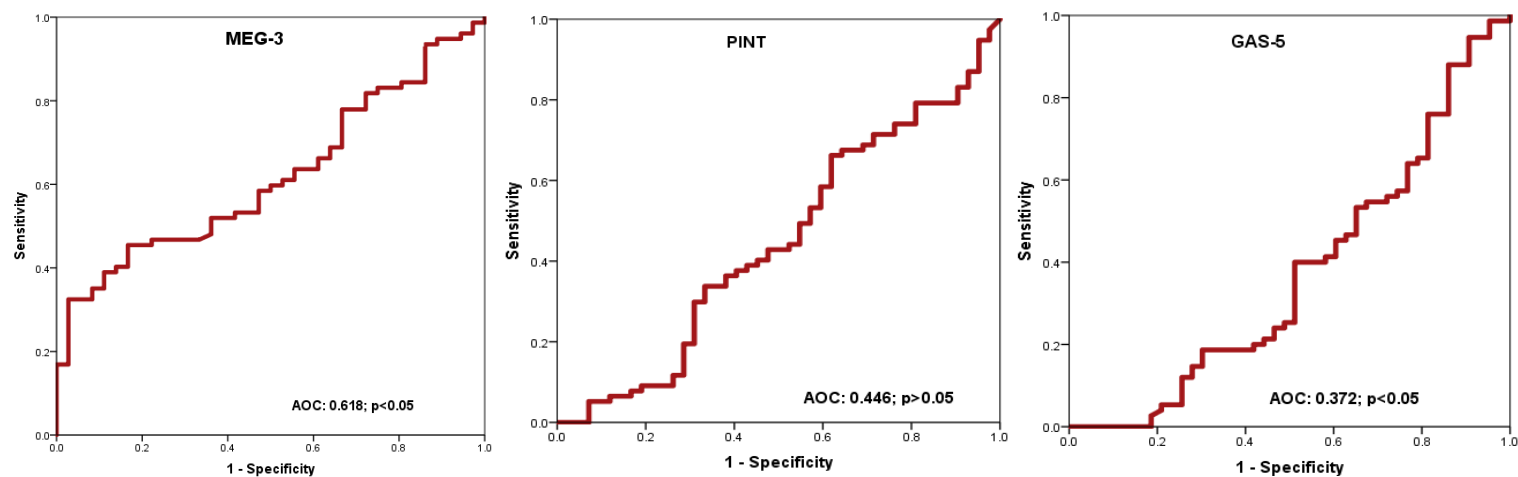

**Figure S4:** Receiver Operating Characteristic Curve (ROC) for predicting clinical diagnosis with lncRNAs (MEG3, PINT and GAS5) expression.
